# Supplementary material for: Comparison of Characteristics and Outcomes of Multisystem Inflammatory Syndrome, Kawasaki Disease and Toxic Shock Syndrome in Children
Source: MDPI journal article supplement (doi:10.3390/medicina59030626), 2023-03-21
Supplement: s1 [file s1]

**Supplementary Material 2:** Characteristics of laboratory analyses and other investigations in patients with MIS-C, KD and TSS

| Laboratory test                                                          | KD<br>n=39        | MIS-C<br>n=29       | TSS<br>n=13         | Total               | <i>P</i> -<br>value | KD vs. MIS-C,<br><i>P</i> -value | MIS-C vs. TSS,<br><i>P</i> -value | KD vs. TSS,<br><i>P</i> -value |
|--------------------------------------------------------------------------|-------------------|---------------------|---------------------|---------------------|---------------------|----------------------------------|-----------------------------------|--------------------------------|
| Total white blood cell count (x10 <sup>3</sup> /μl), median (IQR)        | 13.0 (10.6-17.6)  | 7.3 (5.1-10.0)      | 16.7 (11.1-21.1)    | 11.2 (7.5-16.5)     | <b>&lt;0.001</b>    | <b>&lt;0.001</b>                 | <b>&lt;0.001</b>                  | 0.26                           |
| Absolute neutrophil count initially (x10 <sup>3</sup> /μl), median (IQR) | 9.1 (6.9-11.9)    | 5.6 (4.0-8.4)       | 15.1 (9.5-19.5)     | 8.5 (5.7-12.7)      | <b>&lt;0.001</b>    | <b>0.001</b>                     | <b>&lt;0.001</b>                  | <b>0.007</b>                   |
| Relative neutrophil count (%), median (IQR)                              | 67.7 (60.0-77.5)  | 83.8 (76.1-87.7)    | 92.1 (83.9-94.7)    | 77.6 (64.8-87.7)    | <b>&lt;0.001</b>    |                                  |                                   |                                |
| Absolute lymphocyte count initially (x10 <sup>3</sup> /μl), median (IQR) | 1.9 (1.3-4.0)     | 0.6 (0.5-0.8)       | 0.5 (0.2-0.7)       | 1.0 (0.5-2.1)       | <b>&lt;0.001</b>    | <b>&lt;0.001</b>                 | <b>0.02</b>                       | <b>&lt;0.001</b>               |
| Platelet count initially (x10 <sup>3</sup> /μl), median (IQR)            | 328 (226-463)     | 130.0 (104.0-178.5) | 209.0 (169.0-251.5) | 221.0 (132.5-329.5) | <b>&lt;0.001</b>    | <b>&lt;0.001</b>                 | <b>0.03</b>                       | <b>0.001</b>                   |
| Anemia, n (%)                                                            | 11 (28.2)         | 15 (51.7)           | 3 (23.1)            | 29 (35.8)           | 0.08                |                                  |                                   |                                |
| Sodium level initially (mmol/l), mean (SD)                               | 137.4 (3.3)       | 132.9 (4.6)         | 131.0 (4.5)         | 134.6 (4.8)         | <b>&lt;0.001</b>    | <b>&lt;0.001</b>                 | 0.23                              | <b>&lt;0.001</b>               |
| Albumin level (g/l), mean (SD)                                           | 31.9 (7.4)        | 27.9 (5.8)          | 24.9 (4.2)          | 29.9 (7.0)          | <b>0.03</b>         | <b>0.03</b>                      | 0.32                              | 0.07                           |
| ESR (mm/h), mean (SD)                                                    | 40.8 (29.7)       | 54.2 (36)           | 11.8 (35.8)         | 40.9 (35.6)         | <b>0.001</b>        | 0.1                              | <b>0.001</b>                      | <b>0.006</b>                   |
| CRP (mg/l), median (IQR)                                                 | 74.0 (47.0-124.0) | 167.9 (106.0-271.0) | 160 (115.2-234.5)   | 117.1 (64.1-193.4)  | <b>&lt;0.001</b>    | <b>&lt;0.001</b>                 | 0.79                              | <b>0.001</b>                   |
| Interleukin-6 (pg/ml), median (IQR)                                      | 93.1 (38-208.3)   | 176.0 (94.8-383.5)  | 134.0 (46.9-406.3)  | 139.0 (59.5-297.5)  | 0.1                 |                                  |                                   |                                |

|                                                         |                        |                            |                          |                        |                  |                  |                  |              |
|---------------------------------------------------------|------------------------|----------------------------|--------------------------|------------------------|------------------|------------------|------------------|--------------|
| Ferritin (ng/ml), median (IQR)                          | 207.5<br>(146.1-360.4) | 543.3<br>(288.0-733.3)     | 149.0<br>(110.9-196.1)   | 299.0 (168.7-545.3)    | <b>&lt;0.001</b> | <b>&lt;0.001</b> | 0.13             | 0.07         |
| Lactate dehydrogenase (U/l), median (IQR)               | 258.0<br>(246.5-299.8) | 273.5<br>(335.0-328.8)     | 337.0<br>(229.0-351.5)   | 273.0 (237.0-329.0)    | 0.76             |                  |                  |              |
| D-dimers (mg/l FEU), median (IQR)                       | 2.7 (0.9-4.8)          | 3.3 (2.5-6.8)              | 3.7 (2.3-5.7)            | 3.1 (1.9-4.9)          | 0.08             |                  |                  |              |
| Fibrinogen (g/l), median (IQR)                          | 4.0 (3.1-5.2)          | 5.2 (4.2-6.3)              | 4.7 (3.1-5.8)            | 4.4 (3.7-5.7)          | <b>0.04</b>      | <b>0.02</b>      | <b>&lt;0.001</b> | 0.66         |
| High-sensitivity Troponin I level (ng/ml), median (IQR) | 0.01 (0.01-3.1)        | 42.3 (15.7-120.4)          | 6.7 (3.3-12.7)           | 8.6 (0.02-36.6)        | <b>&lt;0.001</b> | <0.001           | <b>0.002</b>     | <b>0.03</b>  |
| NT-proBNP (pg/ml), median (IQR)                         | 1526 (442-4107)        | 5318.4<br>(1950.1-13312.6) | 1733.8<br>(245.0-1733.8) | 3189.2 (1423.8-8186.8) | <b>0.008</b>     | 0.005            | 0.08             | 0.57         |
| Increased liver enzymes, n (%)                          | 19 (50)                | 14 (48.3)                  | 10 (76.9)                | 43 (53.1)              | 0.17             |                  |                  |              |
| Acute kidney injury, n (%)                              | 3 (7.7)                | 4 (13.8)                   | 6 (46.2)                 | 13 (16.0)              | <b>0.01</b>      | 0.45             | <b>0.046</b>     | <b>0.005</b> |
