# Supplementary material for: Comparison of Characteristics and Outcomes of Multisystem Inflammatory Syndrome, Kawasaki Disease and Toxic Shock Syndrome in Children
Source: MDPI journal article supplement (doi:10.3390/medicina59030626), 2023-03-21
Supplement: s1 [file s1]

**Supplementary Material 1:** Distribution of clinical characteristics of patients with KD, MIS-C and TSS

| Clinical characteristics                 | KD        | MIS-C     | TSS        | Total     | <i>P</i> -value  | KD vs. MIS-C,<br><i>P</i> -value | MIS-C vs.<br>TSS, <i>P</i> -value | KD vs. TSS,<br><i>P</i> -value |
|------------------------------------------|-----------|-----------|------------|-----------|------------------|----------------------------------|-----------------------------------|--------------------------------|
| Dermatological/mucocutaneous involvement |           |           |            |           |                  |                                  |                                   |                                |
| Conjunctivitis, n (%)                    | 35 (89.7) | 24 (82.8) | 7 (53.8)   | 66 (81.5) | <b>0.02</b>      | 0.48                             | 0.07                              | <b>0.01</b>                    |
| Changes in lips and oral cavity, n (%)   | 36 (97.3) | 28 (96.6) | 12 (92.3)  | 76 (96.2) | 0.57             |                                  |                                   |                                |
| Polymorphous exanthema, n (%)            | 37 (94.9) | 26 (89.7) | 13 (100.0) | 76 (93.8) | 0.57             |                                  |                                   |                                |
| Changes in extremities, n (%)            | 25 (73.5) | 16 (55.2) | 10 (76.9)  | 51 (67.1) | 0.22             |                                  |                                   |                                |
| Cervical lymphadenopathy, n (%)          | 25 (75.8) | 12 (41.4) | 2 (15.4)   | 39 (52.0) | <b>&lt;0.001</b> | <b>0.006</b>                     | 0.16                              | <b>&lt;0.001</b>               |
| Gastrointestinal involvement             |           |           |            |           |                  |                                  |                                   |                                |
| Abdominal pain, n (%)                    | 9 (23.1)  | 23 (79.3) | 5 (38.5)   | 37 (45.7) | <b>&lt;0.001</b> | <b>&lt;0.001</b>                 | <b>0.02</b>                       | 0.30                           |
| Diarrhoea, n (%)                         | 10 (25.6) | 19 (65.5) | 4 (30.8)   | 33 (40.7) | <b>0.003</b>     | <b>0.001</b>                     | <b>0.04</b>                       | 0.73                           |
| Vomitting, n (%)                         | 13 (33.3) | 16 (55.2) | 9 (69.2)   | 38 (46.9) | <b>0.04</b>      | <b>0.07</b>                      | 0.39                              | <b>0.02</b>                    |
| Respiratory symptoms                     |           |           |            |           |                  |                                  |                                   |                                |
| Cough, n (%)                             | 22 (56.4) | 13 (44.8) | 6 (46.2)   | 41 (50.6) | 0.60             |                                  |                                   |                                |
| Shortness of breath, n (%)               | 8 (20.5)  | 14 (48.3) | 6 (46.2)   | 28 (34.6) | <b>0.04</b>      |                                  |                                   |                                |
| Cardiovascular symptoms                  |           |           |            |           |                  |                                  |                                   |                                |
| Shock, n (%)                             | 7 (17.9)  | 18 (62.1) | 13 (100.0) | 38 (46.9) | <b>&lt;0.001</b> | <b>&lt;0.001</b>                 | <b>0.01</b>                       | <b>&lt;0.001</b>               |
| Hypotension, n (%)                       | 2 (5.1)   | 16 (55.2) | 10 (76.9)  | 28 (34.6) | <b>&lt;0.001</b> | <b>&lt;0.001</b>                 | 0.30                              | <b>&lt;0.001</b>               |
| Musculoskeletal symptoms                 |           |           |            |           |                  |                                  |                                   |                                |
| Arthralgias, n (%)                       | 9 (23.1)  | 1 (3.4)   | 1 (7.7)    | 11 (13.6) | <b>&lt;0.001</b> | <b>&lt;0.001</b>                 | 0.47                              | <b>0.007</b>                   |
| Synovitis, n (%)                         | 28 (71.8) | 0         | 1 (7.7)    | 29 (35.8) |                  | 0.99                             | -                                 | <b>&lt;0.001</b>               |
| Myalgias, n (%)                          | 0         | 5 (17.2)  | 3 (23.1)   | 8 (9.9)   |                  | -                                | 0.52                              | -                              |
| Neurologic symptoms                      |           |           |            |           |                  |                                  |                                   |                                |
| Headache, n (%)                          | 7 (17.9)  | 15 (51.7) | 4 (30.8)   | 26 (32.1) | <b>0.01</b>      | <b>0.003</b>                     | 0.21                              | 0.44                           |
| Neck stiffness, n (%)                    | 1 (2.6)   | 5 (17.2)  | 2 (15.4)   | 8 (9.9)   | 0.08             |                                  |                                   |                                |
| Photophobia, n (%)                       | 3 (7.7)   | 2 (6.9)   | 2 (15.4)   | 7 (8.6)   | 0.66             |                                  |                                   |                                |
| Meningism, n (%)                         | 1 (2.6)   | 2 (6.9)   | 2 (15.4)   | 5 (6.2)   | 0.23             |                                  |                                   |                                |

|                      |         |          |         |           |      |
|----------------------|---------|----------|---------|-----------|------|
| Hyperesthesia, n (%) | 3 (7.7) | 8 (27.6) | 1 (7.7) | 12 (14.8) | 0.07 |
|----------------------|---------|----------|---------|-----------|------|
